# Supplementary material
Source: PubMed Central journal article supplement (PMC3234104)

Fig 1S

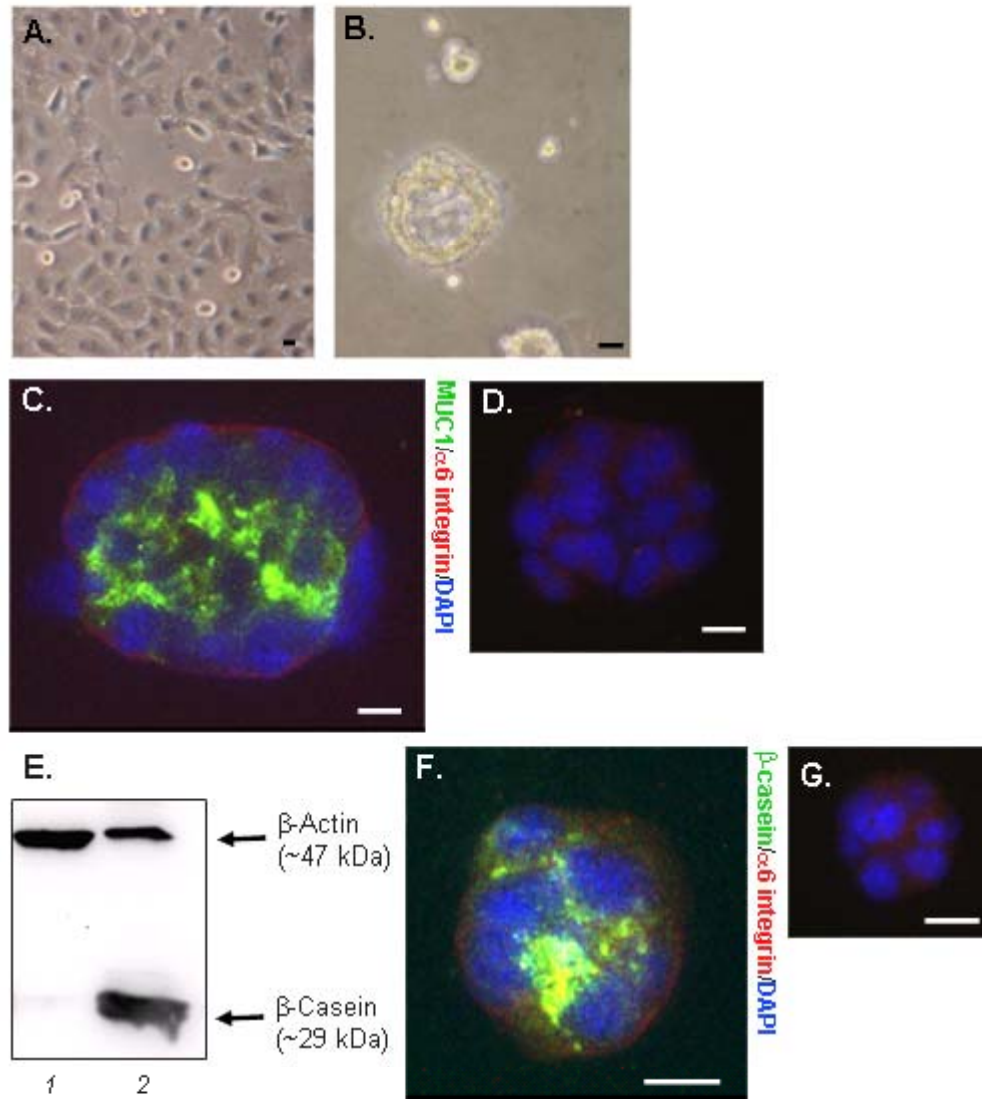

Fig 2S

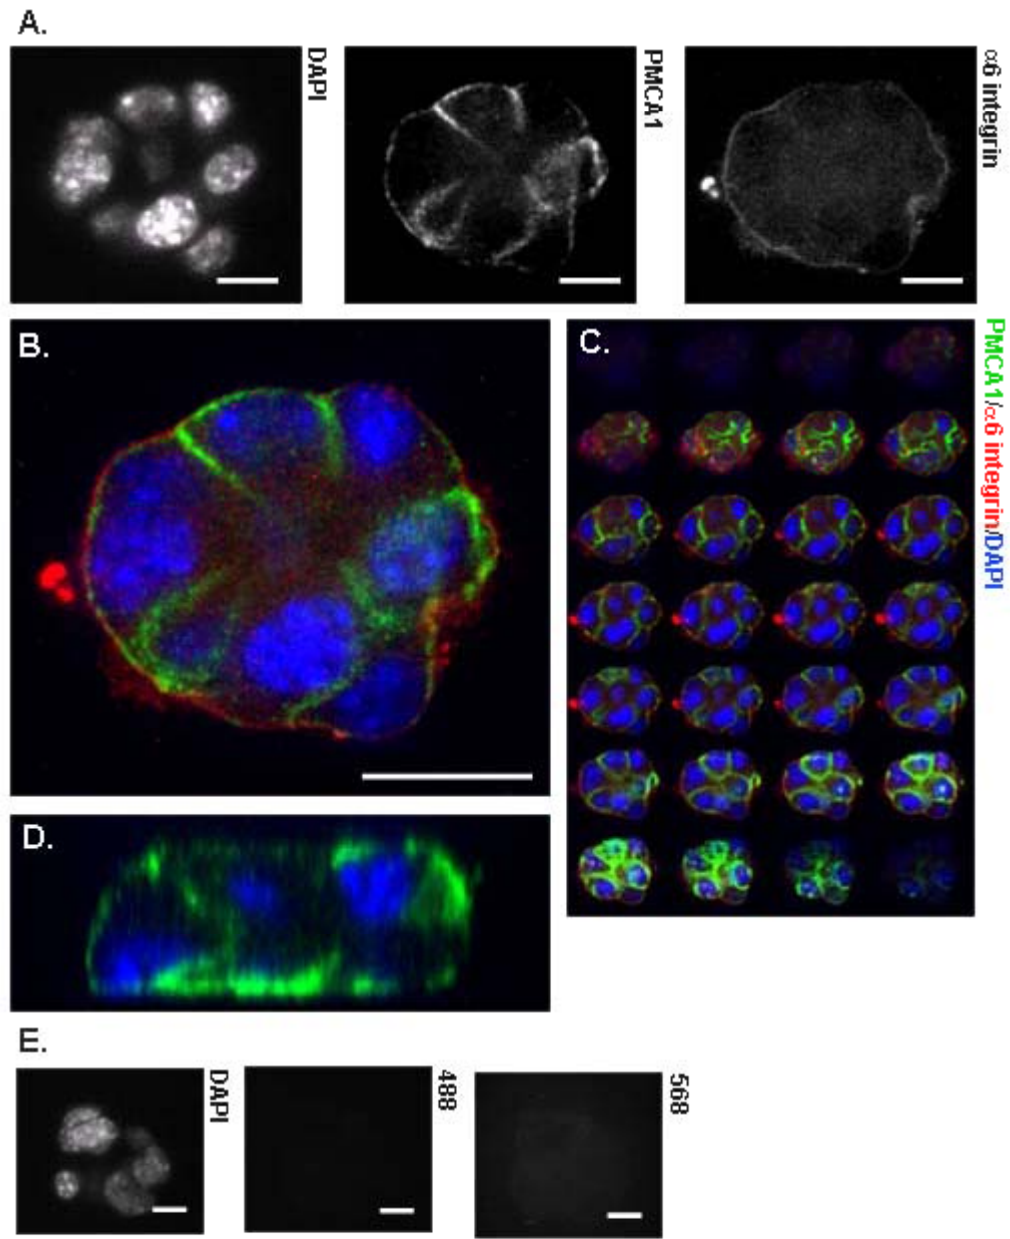

Fig 3S

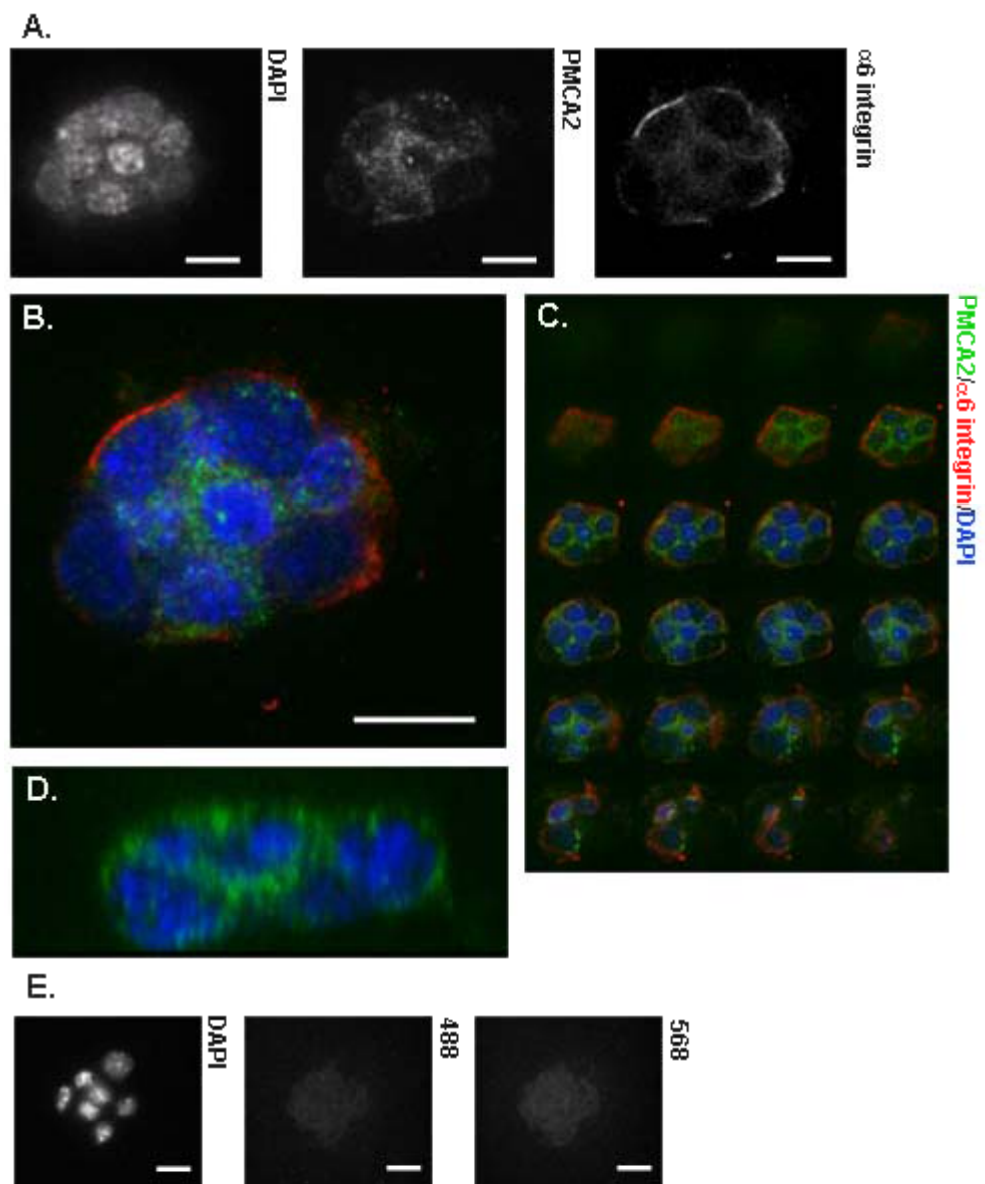

Supplement: NIHMS106086-supplement-Supplementary_figures.pdf [file NIHMS106086-supplement-Supplementary_figures.pdf]
